# Supplementary material
Source: PubMed Central journal article supplement (PMC4529793)
Supplement: NIHMS663271-supplement-supplement_1.pdf [file NIHMS663271-supplement-supplement_1.pdf]

**Supplemental Data 1. Interferon-Inducible Genes in Clinical Subgroups of SLICC SLE+ Patients**

|        | SLE (RNP-)                         | SLE (RNP+)                          | SLE (MCTD+)                         | MCTD                                | Normal     |
|--------|------------------------------------|-------------------------------------|-------------------------------------|-------------------------------------|------------|
| N = 43 | N = 3                              | N = 21                              | N = 9                               | N = 10                              | N = 22     |
| IFI27  | 11.1 ± 2.7<br>p = 0.009 vs normals | 9.4 ± 1.6<br>p < 0.0001 vs normals  | 9.2 ± 2.4<br>p = 0.007 vs normals   | 9.2 ± 2.2<br>p = 0.003 vs normals   | 6.7 ± 0.9  |
| IFI44  | 12.2 ± 0.5<br>p = 0.005 vs normals | 12.0 ± 0.6<br>p < 0.0001 vs normals | 11.2 ± 1.5<br>p = 0.001 vs normals  | 11.7 ± 0.8<br>p < 0.0001 vs normals | 9.3 ± 0.6  |
| IFI44L | 12.3 ± 0.6<br>p = 0.005 vs normals | 12.2 ± 0.8<br>p < 0.0001 vs normals | 11.6 ± 1.9<br>p = 0.0007 vs normals | 12.1 ± 0.9<br>p < 0.0001 vs normals | 8.6 ± 0.9  |
| RSAD2  | 12.6 ± 0.3<br>p = 0.005 vs normals | 12.3 ± 0.7<br>p < 0.0001 vs normals | 11.7 ± 1.7<br>p = 0.0007 vs normals | 12.2 ± 1.0<br>p < 0.0001 vs normals | 9.0 ± 0.8  |
| IFI6   | 10.5 ± 0.8<br>p = 0.005 vs normals | 10.1 ± 0.6<br>p < 0.0001 vs normals | 9.5 ± 1.5<br>p = 0.0008 vs normals  | 10.0 ± 0.8<br>p < 0.0001 vs normals | 7.2 ± 0.6  |
| IFIT1  | 12.5 ± 0.3<br>p = 0.005 vs normals | 12.3 ± 0.6<br>p < 0.0001 vs normals | 11.6 ± 1.5<br>p = 0.0008 vs normals | 12.2 ± 0.9<br>p < 0.0001 vs normals | 9.4 ± 0.9  |
| IFIT3  | 12.7 ± 0.3<br>p = 0.005 vs normals | 12.5 ± 0.4<br>p < 0.0001 vs normals | 12.1 ± 1.1<br>p = 0.0001 vs normals | 12.5 ± 0.7<br>p < 0.0001 vs normals | 10.1 ± 0.6 |
| IRF3   | 9.0 ± 0.3                          | 8.6 ± 0.4<br>p = 0.0001 vs normals  | 8.8 ± 0.2                           | 8.9 ± 0.2                           | 9.0 ± 0.2  |
| IRF5   | 8.7 ± 0.9                          | 8.8 ± 0.6                           | 9.1 ± 0.5<br>p = 0.003 vs           | 9.0 ± 0.5<br>p = 0.008 vs           | 8.5 ± 0.4  |

|         |                                    |                                     | normals                            | normals                             |           |
|---------|------------------------------------|-------------------------------------|------------------------------------|-------------------------------------|-----------|
| IRF7    | 10.1 ± 0.7<br>p = 0.005 vs normals | 9.8 ± 0.6<br>p < 0.0001 vs normals  | 9.4 ± 0.9<br>p < 0.0001 vs normals | 9.9 ± 0.6<br>p < 0.0001 vs normals  | 7.8 ± 0.3 |
| OAS1    | 10.3 ± 0.7<br>p = 0.005 vs normals | 9.9 ± 0.9<br>p < 0.0001 vs normals  | 9.5 ± 1.6<br>p = 0.007 vs normals  | 9.9 ± 1.3<br>p = 0.0002 vs normals  | 7.5 ± 0.5 |
| OAS2    | 9.7 ± 0.4<br>p = 0.005 vs normals  | 9.6 ± 0.8<br>p < 0.0001 vs normals  | 9.3 ± 1.2<br>p = 0.01 vs normals   | 9.5 ± 1.0<br>p = 0.0002 vs normals  | 7.7 ± 0.3 |
| SIGLEC1 | 10.6 ± 1.4<br>p = 0.005 vs normals | 10.1 ± 1.3<br>p < 0.0001 vs normals | 9.9 ± 2.2<br>p = 0.005 vs normals  | 10.0 ± 2.0<br>p = 0.0002 vs normals | 7.0 ± 0.9 |
| USP18   | 10.1 ± 1.3<br>p = 0.005 vs normals | 9.0 ± 1.5<br>p < 0.0001 vs normals  | 8.7 ± 2.0<br>p = 0.008 vs normals  | 9.0 ± 1.6<br>p = 0.0001 vs normals  | 6.0 ± 0.4 |

Affymetrix U133 Plus 2.0 mRNA expression array data (in arbitrary expression units relative to normal standard) for interferon-inducible genes that showed differences compared to control subjects. For genes with multiple readouts, averages of all the values are used. Between-group comparisons are with the Mann-Whitney test. No significant differences between patient subgroups were identified.
